# Supplementary material
Source: Springer Nature journal article supplement (https://www.springermedizin.de/resource/supplementary/12888_2013_1388_MOESM9_ESM.pdf/9480098)
Supplement: MOESM9 [file 9480098]

|                                                                      | baseline phase |     |                                  | 12 week short-term phase (S)                                                                                    |     |    |    |    | 12 months long-term phase (L) |     |     |     | End of Study Visit |  |
|----------------------------------------------------------------------|----------------|-----|----------------------------------|-----------------------------------------------------------------------------------------------------------------|-----|----|----|----|-------------------------------|-----|-----|-----|--------------------|--|
| Planned Study Day                                                    | -42 to -16     | -15 | - 14 to -1                       | 1                                                                                                               | 15  | 56 | 83 | 84 | 175                           | 267 | 358 | 449 | 450                |  |
| Visit                                                                | Screening      | P0  | 2 sessions of diabetes education | S1                                                                                                              | S2* | S3 | S4 | P1 | L1                            | L2  | L3  | L4  | P2                 |  |
| Screening information, informed consent                              | D              |     |                                  |                                                                                                                 |     |    |    |    |                               |     |     |     |                    |  |
| Screening, inclusion/exclusion criteria                              | D              |     |                                  |                                                                                                                 |     |    |    |    |                               |     |     |     |                    |  |
| Blood-sample (HbA1c)                                                 | D              |     |                                  | D                                                                                                               |     |    | D  |    | D                             | D   | D   | D   |                    |  |
| Blood-sample (liver enzymes, other endocr. parameters)               | D              |     |                                  | D                                                                                                               |     |    |    |    | D                             |     |     | D   |                    |  |
| Treatment preference                                                 |                | P   |                                  |                                                                                                                 |     |    |    |    |                               |     |     |     |                    |  |
| CES-D questionnaire                                                  | D              |     |                                  | D                                                                                                               |     |    | D  |    | D                             | D   | D   | D   |                    |  |
| Diagnosis information, informed consent                              | D              |     |                                  |                                                                                                                 |     |    |    |    |                               |     |     |     |                    |  |
| Other questionnaires                                                 |                | P   |                                  |                                                                                                                 |     |    |    | P  |                               |     |     |     | P                  |  |
| Hamilton Rating Scale (HAM-D-17)                                     |                | P   |                                  |                                                                                                                 |     |    |    | P  |                               |     |     |     | P                  |  |
| SCID-Interview                                                       |                | P   |                                  |                                                                                                                 |     |    |    |    |                               |     |     |     | P                  |  |
| Review mental disorder related inclusion/exclusion criteria          |                | P   |                                  |                                                                                                                 |     |    |    |    |                               |     |     |     |                    |  |
| Treatment information, informed consent                              |                | P   |                                  | D                                                                                                               |     |    |    |    |                               |     |     |     |                    |  |
| Randomisation                                                        |                |     |                                  | D                                                                                                               |     |    |    |    |                               |     |     |     |                    |  |
| CBT group: Cognitive behavioural therapy                             |                |     |                                  | <b>10 sessions P</b>                                                                                            |     |    |    |    |                               |     |     |     |                    |  |
| Sertraline group: Delivery of medication                             |                |     |                                  | D                                                                                                               | D   | D  | D  |    | D                             | D   | D   | D   |                    |  |
| Sertraline group: Blood-sample (plasma concentrations of sertraline) |                |     |                                  |                                                                                                                 |     | D  | D  |    | D                             | D   | D   | D   |                    |  |
| Diabetological treatment as usual                                    | D              |     |                                  | D                                                                                                               |     |    | D  |    | D                             | D   | D   | D   |                    |  |
| Dose adjustment insulin/sertraline                                   |                |     |                                  | optional supplementary visits in case of problems with diabetological treatment or side-effects of sertraline D |     |    |    |    |                               |     |     |     |                    |  |
| Recording and monitoring of adverse events                           |                |     |                                  | continuously D, P                                                                                               |     |    |    |    |                               |     |     |     |                    |  |
| Recording of concomitant medication                                  |                |     | continuously D                   |                                                                                                                 |     |    |    |    |                               |     |     |     |                    |  |
| Review inclusion/exclusion criteria                                  |                |     | continuously D, P                |                                                                                                                 |     |    |    |    |                               |     |     |     |                    |  |
